# Supplementary material
Source: Springer Nature journal article supplement (https://www.springermedizin.de/resource/supplementary/12872_2009_279_MOESM4_ESM.pdf/9429638)

Probability

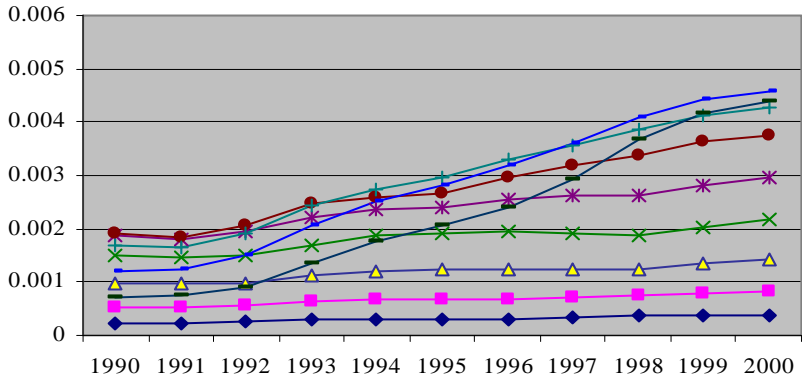

Calendar Year

Supplement: MOESM4 [file 9429638]
